# Supplementary material for: Ultrasensitive detection of transcription factors with a highly-efficient diaminoterephthalate fluorophore via an electrogenerated chemiluminescence strategy
Source: Royal Society of Chemistry journal article supplement (doi:10.1039/c9cc05692k), 2019-01-01
Supplement: c9cc05692k1.pdf [file c9cc05692k1.pdf]

***Electronic supplementary information for:***

**Ultrasensitive detection of transcription factors with highly-efficient diaminoterephthalate fluorophore in electrogenerated chemiluminescence strategy**

Zhenqiang Fan,<sup>‡, a, b</sup> Jianfeng Wang,<sup>‡, a</sup> Nan Hao,<sup>‡, c</sup> Yihao Li,<sup>a</sup> Yuhang Yin,<sup>a</sup> Zepeng Wang,<sup>a</sup> Yuedi Ding,<sup>b</sup> Jianfeng Zhao,<sup>\*, a</sup> Kai Zhang,<sup>\*, b</sup> Wei Huang<sup>\*, a, d</sup>

*<sup>a</sup>Key Laboratory of Flexible Electronics (KLOFE) & Institute of Advanced Materials (IAM), Jiangsu National Synergetic Innovation Center for Advanced Materials (SICAM), Nanjing Tech University (NanjingTech), 30 South Puzhu Road, Nanjing 211816, P.R. China.*

*<sup>b</sup>Key Laboratory of Nuclear Medicine, Ministry of Health, Jiangsu Key Laboratory of Molecular Nuclear Medicine, Jiangsu Institute of Nuclear Medicine, Wuxi, Jiangsu 214063, China.*

*<sup>c</sup>School of Chemistry and Chemical Engineering, Jiangsu University, Zhenjiang, Jiangsu 212013, P.R. China*

*<sup>d</sup>Shaanxi Institute of Flexible Electronics (SIFE), Northwestern Polytechnical University (NPU), 127 West Youyi Road, Xi'an 710072, Shaanxi, P. R. China.*

---

\* Corresponding author. Fax: +86-510-85508775; Tel: +86-510-85508775

E-mail addresses: iamjfzhao@outlook.com; zhangkai@jsinm.org; iamwhuang@njtech.edu.cn

## 1. Experimental section

### 1.1 Materials and chemicals

Gold chloride hydrate ( $\text{HAuCl}_4 \cdot x\text{H}_2\text{O}$ ) was purchased from Aladdin Biochemical Technology Co. Ltd. (Shanghai, China). Sodium borohydride, Acetic Acid and Ethylene Diamine Tetraacetic Acid (EDTA) were obtained from Sinopharm Chemical Reagent Co. Ltd. (Shanghai, China). Triethylamine was from Acros Organics (France). Trisodium citrate dihydrate was purchased from Sigma (USA). Silver nitrate were provided by Boer Chemical Reagent Co. Ltd. (Shanghai, China). Dimethyl 2,5-dioxocyclohexane-1,4-dicarboxylate was from Energy Chemical (Shanghai, China). Dichloromethane and petroleum ether were provided by Aopuqi Pharmaceutical Technology Co. Ltd. (Nanjing). 2,6-diisopropylaniline and Pluronic P123 came from Heowns (Tianjin, China). Oligonucleotides purified through HPLC method were purchased from Genscript Bio-technology Co. Ltd. (Nanjing, China) and in Table S1 the sequences depicted. NF- $\kappa$ B p50 (human recombinant) with N-terminal His Tag purchased from Hengfei Biotechnology Co. Ltd. (Shanghai). Exonuclease III (Exo III), threo-1,4-dimercapto-2,3-butandioland (DTT), 6-Hydroxy-1-hexanethiol (MCH), tris(2-carboxyethyl) phosphine hydrochloride (TCEP), Tris-HCl and PBS (phosphate buffer saline) buffer solution were available in Sangon Biotech Co. Ltd. (Shanghai). The water during the whole progresses was purified by Milli-Q purification system (Branstead).

### 1.2 Synthesis and purification of illuminator (I) and preparation of Au@I

Dimethyl 2,5-dioxocyclohexane-1,4-dicarboxylate (10 mmol) and 2,6-diisopropylaniline (25 mmol) were dissolved in the mixture solution of ethanol/ acetic acid (2:1) and stirred at 90 °C in a one-neck flask for 4 hours. When it was cooled to room temperature, it was filtered and washed with ethanol for several times. Finally, the crude product was purified by column chromatography using dichloromethane and petroleum ether ( $R_f = 0.4$ ).

We successfully synthesized Au@I nanocomposites by modifying the methods in the literature.<sup>1</sup> Briefly, we dissolved 10 mg of I in tetrahydrofuran followed by sonication, and then the solution

was added to 50 mL prepared solution containing 1 mg mL<sup>-1</sup> Pluronic P123. At the same time, 5 mL HAuCl<sub>4</sub>·xH<sub>2</sub>O solution (0.01 M) was injected into the mixture with stirring. After that, the mixture was heated to 100 °C under agitation. At the boiling temperature of water for 30 seconds, the mixture turned burgundy when 5 mL trisodium citrate dihydrate solution (0.03 M) was added to the mixture. After reacting at 100 °C for 15 min, the mixture was centrifuged at 7000 rpm for 10 min when cooled to room temperature. Followed by washed twice by ethanol and ultrapure water, we obtained Au@I nanocomposites dispersed in ultrapure water. Finally, the Au@I nanocomposites was stored in a refrigerator at 4 °C for future use.

### *1.3 Preparation of Ag nanocluster*

According to the literature, we successfully synthesized Ag nanoclusters.<sup>2</sup> Firstly, we added 2 μL of AgNO<sub>3</sub> (25 mM) solution to 450 μL of template DNA solution (10 μM, pH 7.5, 5.0 mM Mg<sup>2+</sup> in 20 mM PBS buffer solution), making the relative concentration ratio of Ag<sup>+</sup> to nucleic acid in the solution was about 8:1 and then the mixture was violently oscillated for 1 min. After that, 3 μL of freshly prepared NaBH<sub>4</sub> solution (25 mM) was added to the solution under ice bath conditions and shaken vigorously for 15 min. Finally, the mixture was placed in the dark at 4 °C overnight to form the Ag nanoclusters.

### *1.4 ECL Biosensor preparation*

Glassy carbon electrode (GCE) was firstly sanded on a nylon cloth with 0.05 μm Al<sub>2</sub>O<sub>3</sub>, then it was dipped in 0.1 M aqueous solution of sulfuric acid containing 0.2 M hydrogen peroxide for two hours to remove the adsorbed material. Finally, it was washed by ultrapure water for several times. 6 μ of suspended solution was applied onto the cleaned glassy carbon electrode. Followed by drying in the air for one hour, the Au@I/GCE was immersed in a PBS buffer solution of 20 mM (pH 7.5).

1 mL PBS buffer (pH 7.5) with a concentration of 20 mM containing 0.2 μM hairpin DNA was activated with 2 μL of 10 mM TCEP at 4 °C for one hour to cut off the S-S bond. Then Au@I/GCE was immersed in 100 μL of the already activated HP solution at 4°C overnight in

order that Au@I/GCE was modified by HP DNA. After that, the electrode was immersed in 60  $\mu\text{L}$  of 20 mM PBS buffer containing 100  $\mu\text{M}$  MCH (pH 7.5) for one hour to passivate the active site on the electrode surface and make the hairpin DNA oriented perpendicular to the electrode surface which is advantageous for further hybridization reaction. Additionally, it is necessary to rinse non-specific adsorbed substances with 20 mM PBS buffer solution from the electrode surface for each step.

### *1.5 Detection of NF- $\kappa$ B p50*

In order to get the DNA duplexes, DNA<sub>1</sub> and DNA<sub>2</sub> with the same concentration of 20  $\mu\text{M}$  were hybridized in the buffer which contained 50 mM Tris-HCl (pH 8.0), 100 mM NaCl and 1 mM EDTA. Then the buffer solution was heated at 90 °C for 5 min, then it was cooled to room temperature for 3 hours. A range of different concentrations of NF- $\kappa$ B p50 (20  $\mu\text{L}$ ) and DNA duplexes (50  $\mu\text{L}$ ) were incubated in protein binding buffer containing 10 mM Tris-HCl (pH 8.0), 100 mM KCl, 2 mM MgCl<sub>2</sub>, 0.1 mM EDTA, 10% glycerol, 0.25 mM DTT at room temperature for 30 min. The transcription factor in the dilution of cell nuclear extracts (20  $\mu\text{L}$ ) to be detected was mixed with DNA duplexes (50  $\mu\text{L}$ ) and incubated for 30 min at room temperature in protein binding buffer. The DNA duplexes bound with transcription factor were digested with 2 U  $\mu\text{L}^{-1}$  (50  $\mu\text{L}$ ) of Exo III for 5 min at 37 °C followed by heated to 70 °C for 20 min to stop the digestion.

For the amplification reach of Exo III, Au@I/GCE was immersed in 100  $\mu\text{L}$  protein binding buffer solution containing the digested DNA duplexes treated by different concentrations of NF- $\kappa$ B p50 and 10  $\mu\text{L}$  (10 U  $\mu\text{L}^{-1}$ ) Exo III to incubate at room temperature for 40 min. Followed by rinsed with 20 mM of PBS buffer (pH 7.5), 100  $\mu\text{L}$  Ag nanoclusters (0.2  $\mu\text{M}$ ) was used to quench the signal at 37 °C for 30 min. Finally, ECL response was tested for with 0.1 M PBS (pH 8.5) containing 18 mM co-reactant triethylamine. The scan range was -1 V to 1.3 V.

### *1.6 Cell culture and preparation of cell nuclear extracts*

Cell culture and preparation of cell nuclear extracts were implemented according the literature.<sup>3</sup> First of all, cells (A549) were cultured in cell culture medium containing 10% fetal calf serum, 100  $\mu\text{g mL}^{-1}$  penicillin and streptomycin at humid atmosphere including 5%  $\text{CO}_2$ . Cell number was calculated by Petroff-Hausser cell counter (USA). Then,  $5 \times 10^7$  cells were put into 1.5 mL EP tube and washed by PBS buffer solution (0°C, pH 7.5) twice. Followed by incubation with 20 ng  $\text{mL}^{-1}$  TNF- $\alpha$  (PeproTech) for 25 min, cell nuclear extracts were obtained by nuclear extract kit (Active Motif, Carlsbad, CA). Finally, they were diluted to 200  $\mu\text{L}$  and stored at -80 °C for future detection.

### *1.7 Nondenaturing polyacrylamide gel electrophoresis (PAGE).*

The DNA solution mixed with loading buffer (TEK buffer, 0.25% bromophenol blue; 60% glycerol) was analyzed in nondenaturing polyacrylamide gel electrophoresis (PAGE) (15%). PAGE was run in TBE (89 mM Tris-boric-acid, 2 mM EDTA, pH 8.0) buffer at 120 V for 2 h at 4 °C. Then the image was obtained by UV light (ChemiDoc MP, Bio-Rad) after staining with GelRed for 30 min.

## **2. Results and discussion**

### *2.1 Characterization of stepwise modification of electrode*

For stepwise modification of the electrode, cyclic voltammetry (CV), electrochemical impedance spectroscopy (EIS) were used to characterize the construction of the biosensor. As depicted in the Fig. S6A, with Au@I nanocomposites (curve b), HP DNA (curve c), MCH (curve d) and NF- $\kappa\text{B}$  p50 (curve e) successively modified on the electrode, the redox peaks continued to decline, which was due to the resistance of electron transfer. However, with Ag nanoclusters (curve f) bound to the modified electrode, an increased redox peak was observed for the conductivity of it. The same is true with the EIS (Fig. S6B), electron transfer resistance ( $R_{\text{et}}$ ) increased with stepwise modification from a to e. While with Ag nanoclusters bound the modified electrode, the  $R_{\text{et}}$  decreased obviously. Both CV and EIS reflected the actual modification stages of the proposed

biosensor.

## 2.2 Optimization of detection conditions

In order to get a good assay condition, we use univariate analysis involved in the concentration of the co-reactant, the pH value of the PBS buffer solution, the targets reaction time, and the quenching time of the Ag nanoclusters. As shown in Fig. S4A, the ECL intensity increases with the concentration of triethylamine until the concentration reaches 18 mM. The impact of pH value (Fig. S4B, ESI†) was also investigated which indicated that the ECL intensity reached its maximum when the value got 8.5. Meanwhile, Fig. S4C and Fig. S4D showed that the most suitable incubation time of targets reaction and quenching time of Ag nanoclusters were 40 min and 30 min respectively, which indicated that 40 min was enough for reporter DNA to open the stem-loop structure and at least 30 min for Ag nanoclusters to quench the ECL signal. Therefore, the assays conditions were confirmed.

## 2.3 Nondenaturing PAGE for the analytical process

To further verify the detection strategy, we applied nondenaturing polyacrylamide gel electrophoresis (PAGE) to monitor the analytical process as shown in Fig. S7. The ssDNA DNA<sub>2</sub> (lane 1) and HP DNA (lane 2) were served as reference bands. The hybridization of DNA<sub>1</sub> and DNA<sub>2</sub> led to a bright dsDNA probe stripe (lane 3). Then the dsDNA probe was incubated with Exo III (lane 4). It can be observed that the stripe of the dsDNA probe disappeared indicating the digestion effect of Exo III. However, dsDNA bound by NF-κB p50 followed by the digestion of Exo III (lane 7) shown that the stripe of DNA<sub>1</sub> was digested by Exo III and the stripe of DNA<sub>2</sub> protected by NF-κB p50 was remained. We could also infer that the binding of NF-κB p50 with dsDNA probe was destroyed during the running of nondenaturing PAGE which was consistent with the previous reports.<sup>4, 5</sup> When Exo III was added into ssDNA DNA<sub>2</sub> solution (lane 5), the stripes of DNA<sub>2</sub> were clearly observed, showing that Exo III would not digest ssDNA. Lane 6 was used to verified that ssDNA DNA<sub>2</sub> could open up the stem-loop structure and form double-stranded DNA which could further for the amplification process. In lane 8, the quick migrated

stripe was from HP DNA which was hybridized with DNA<sub>2</sub> and cut by Exo III. The slow migrated stripe was the DNA<sub>2</sub> which was free from being digested.

#### 2.4 Possible ECL mechanism and electrochemical activity of Au@I nanocomposite

In order to confirm the ECL mechanism of Au@I nanocomposites, a series of systematic experiments was carried out. Firstly, ECL response and its corresponding CV measurements with and without the co-reactant (TEA) were investigated, respectively, which had been showed in Fig. S9. Obviously, in the typical PBS buffer solution without co-reactant, the ECL signal is feeble, the max current of CV curve between -0.1 to 1.1 V was only 10<sup>-6</sup> A. However, in the PBS buffer solution containing 18 μM TEA, the ECL signal raised to 2000 a.u. and the oxidation peak current was raised about 200 folds, which indicating that TEA was oxidized to TEA<sup>•+</sup> and participated in the ECL process of the illuminators. Therefore, two possible ECL mechanism of Au@I is predicted by us as showed below. In a nutshell, TEA loses an electron to generate TEA radical cations (TEA<sup>•+</sup>), and then acts with I to form the electronically excited state of I\* via the different routes depicted simply in reactions A and B, respectively.

A

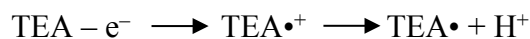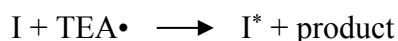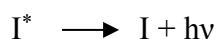

B

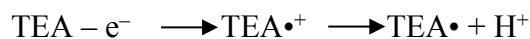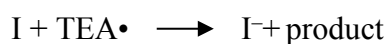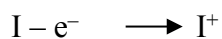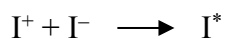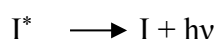

Besides, we had compared the ECL intensity of TEA and TrPA as co-reactants, respectively, as depicted in Fig. S10. We could see that TEA as co-reactant was better than TrPA as co-reactant when detecting different concentrations of NF-κB p50.

**Table S1.** Oligonucleotides sequence used in this method. The colors of the sequences are corresponding to scheme 1. The underline bases of DNA1 and DNA2 are the binding sites of NF- $\kappa$ B p50. The double underline bases are the sequences of stem loop structure. The bold sequences of template DNA can hybridize with the matching sequences of HP DNA. And the italic sequences with wavy line are used to form Ag nanoclusters.

| note         | sequence (5'-3')                                                        |
|--------------|-------------------------------------------------------------------------|
| DNA1         | <u>GGG ACT TTC CA TAT TTA CGC GCG TGC TAC</u>                           |
| DNA2         | <u>GTA GCA CGC GCG TAA ATA TGG AAA GTC CC</u>                           |
| HP DNA       | HS-TTT TTTT TTT ATA AGG <u>GTA GCA</u> AT ATT TAC GCG CGT <u>GCT AC</u> |
| Template DNA | <b>TGC TAC CCT TAT <u>CCC.CTA.ACT.CCCC</u></b>                          |

**Table S2.** The crystal cell parameters of compound I

|                        |                |                 |                |
|------------------------|----------------|-----------------|----------------|
| Cell:                  | a=17.3700 (12) | b=8.4480 (6)    | c=21.8927 (15) |
|                        | alpha=90       | beta=96.101 (3) | gamma=90       |
| Temperature:           | 304 K          |                 |                |
|                        | Calculated     | Reported        |                |
| Volume                 | 3194.4 (4)     | 3194.4 (4)      |                |
| Space group            | C 2/c          | C 1 2/c 1       |                |
| Hall group             | -C 2yc         | -C 2yc          |                |
| Moiety formula         | C34 H44 N2 O4  | C34 H44 N2 O4   |                |
| Sum formula            | C34 H44 N2 O4  | C34 H44 N2 O4   |                |
| Mr                     | 544.71         | 544.71          |                |
| Dx, g cm <sup>-3</sup> | 1.133          | 1.133           |                |
| Z                      | 4              | 4               |                |
| Mu (mm <sup>-1</sup> ) | 0.074          | 0.074           |                |
| F000                   | 1176.0         | 1176.0          |                |
| F000'                  | 1176.50        |                 |                |
| h, k, lmax             | 21, 10, 27     | 21, 10, 27      |                |
| Nref                   | 3133           | 3085            |                |
| Tmin, Tmax             | 0.991, 0.996   | 0.628, 0.746    |                |
| Tmin'                  | 0.985          |                 |                |

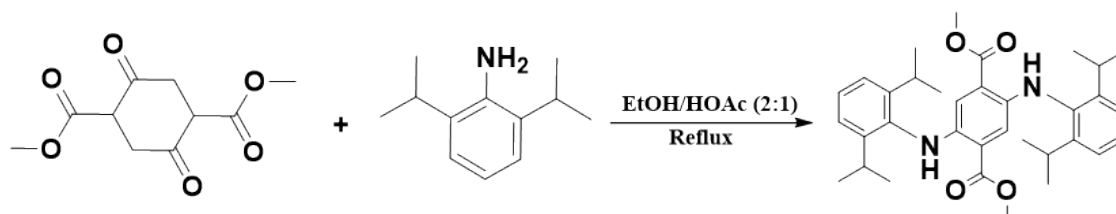

**Fig. S1.** Synthesis step of compound I.





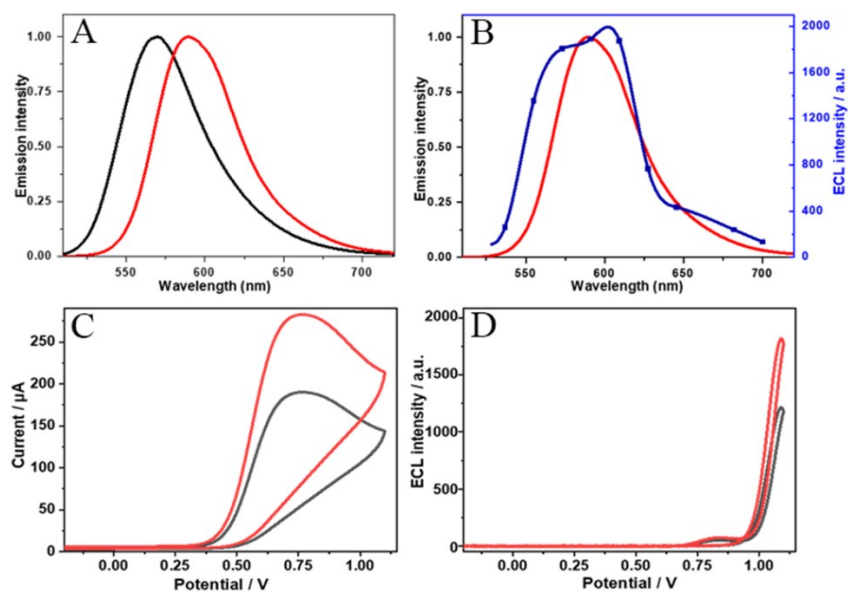

**Fig. S3.** (A) FL spectra of (black line) I dissolved in tetrahydrofuran, (red line) emulsified I in aqueous solution. (B) FL spectra of emulsified I (red line) and ECL emission spectra of Au@I (blue line) in aqueous solution. (C) CV curves of emulsified I (black line) and Au@I (red line) in the presence of 18 mM TEA. (D) ECL-potential plot of emulsified I (black line) and Au@I (red line) in the presence of 18 mM TEA.

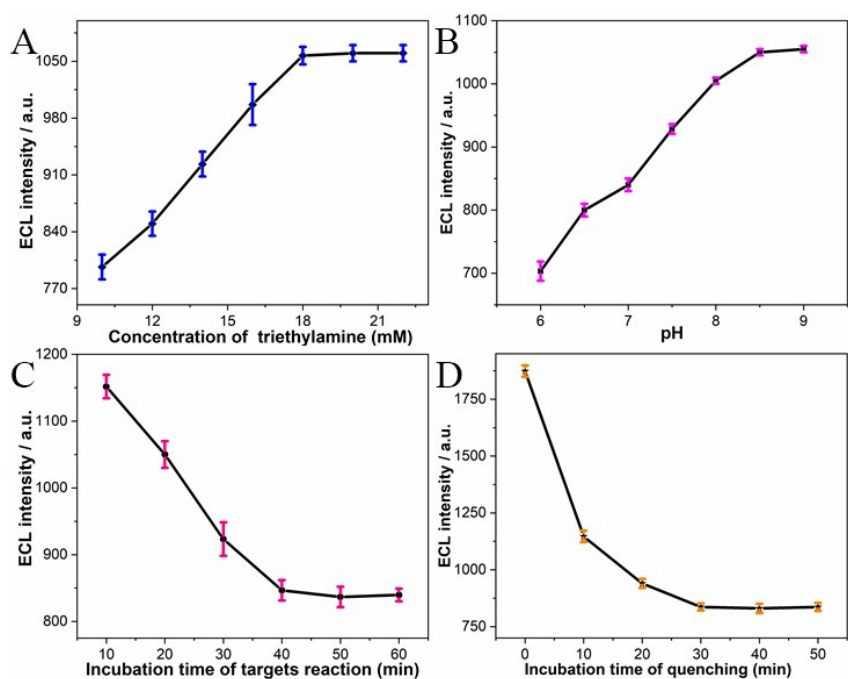

**Fig. S4.** (A) ECL intensity at different concentrations of triethylamine and (B) pH of detection solution in the presence of 10 nM NF- $\kappa$ B p50. (C) ECL intensity versus the time of targets reaction and (D) quenching in the presence of 100 nM NF- $\kappa$ B p50.

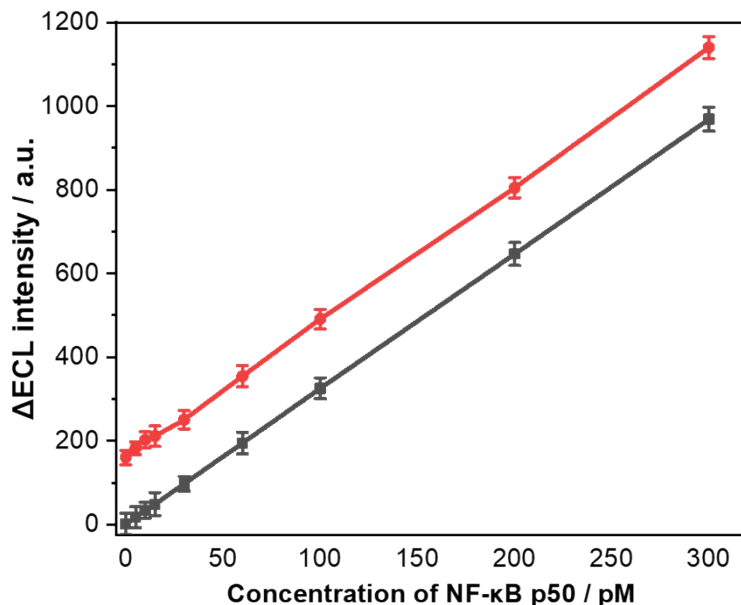

**Fig. S5.** Practical detected samples (red point) from dilution of cell nuclear extracts and spiked samples (black point) with the same concentration of NF- $\kappa$ B p50 (0, 10, 30, 60, 100, 200, 300 pM) in PBS buffer solution (pH 8.5) containing 18 mM triethylamine.

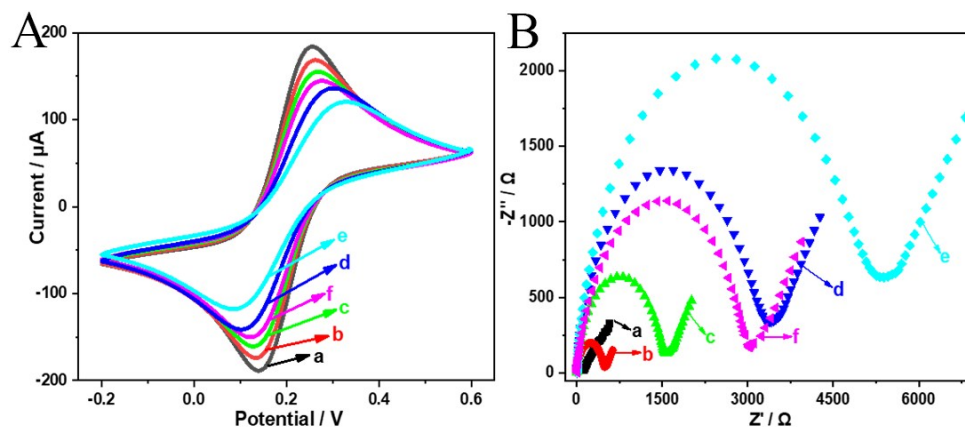

**Fig. S6.** (A) CV, (B) EIS and for the stepwise fabrication of the electrode. (a) Bare GCE, (b) GCE/Au@I nanocomposites, (c) GCE/Au@I nanocomposites/HP DNA, (d) GCE/Au@I nanocomposites/HP DNA/MCH, (e) GCE/Au@I nanocomposites/HP DNA/MCH/dsDNA treated by 400 pM NF- $\kappa$ B p50 and Exo III, (f) GCE/Au@I nanocomposites/HP DNA/MCH/dsDNA treated by 400 pM NF- $\kappa$ B p50 and Exo III/Ag nanoclusters. The electrolyte is 0.1 M PBS phosphate solution (pH 7.5) containing 5 mM  $[\text{Fe}(\text{CN})_6]^{3-/4-}$ .

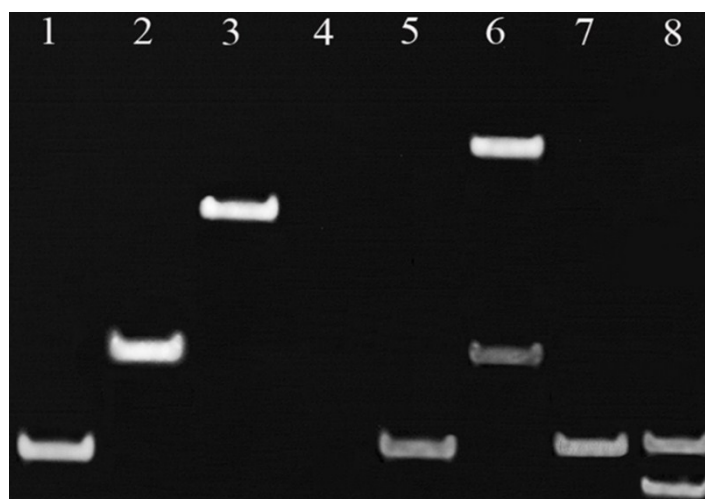

**Fig. S7.** Nondenaturing PAGE for the verification of the analytical process. Lane 1,2 and 3 were 1  $\mu\text{M}$  of pure DNA<sub>2</sub>, HP DNA and dsDNA probe, respectively. Lane 4 was 1  $\mu\text{M}$  dsDNA probe incubated with 20 U mL<sup>-1</sup> Exo III for 30 min. Lane 5 was 1  $\mu\text{M}$  DNA<sub>2</sub> incubated with 20 U mL<sup>-1</sup> Exo III. Lane 6 was 0.5  $\mu\text{M}$  DNA<sub>2</sub> incubated with 1  $\mu\text{M}$  HP DNA. Lane 7 was 1  $\mu\text{M}$  of dsDNA probe incubated with 1.5  $\mu\text{M}$  NF- $\kappa\text{B}$  p50 for 30 min, then the mixture was incubated with Exo III for 30 min. Lane 8 was 1  $\mu\text{M}$  of dsDNA incubated with 1.5  $\mu\text{M}$  NF- $\kappa\text{B}$  p50 for 30 min, followed by 30 min digestion of Exo III, and then reacted with 1  $\mu\text{M}$  HP DNA for 1 h.

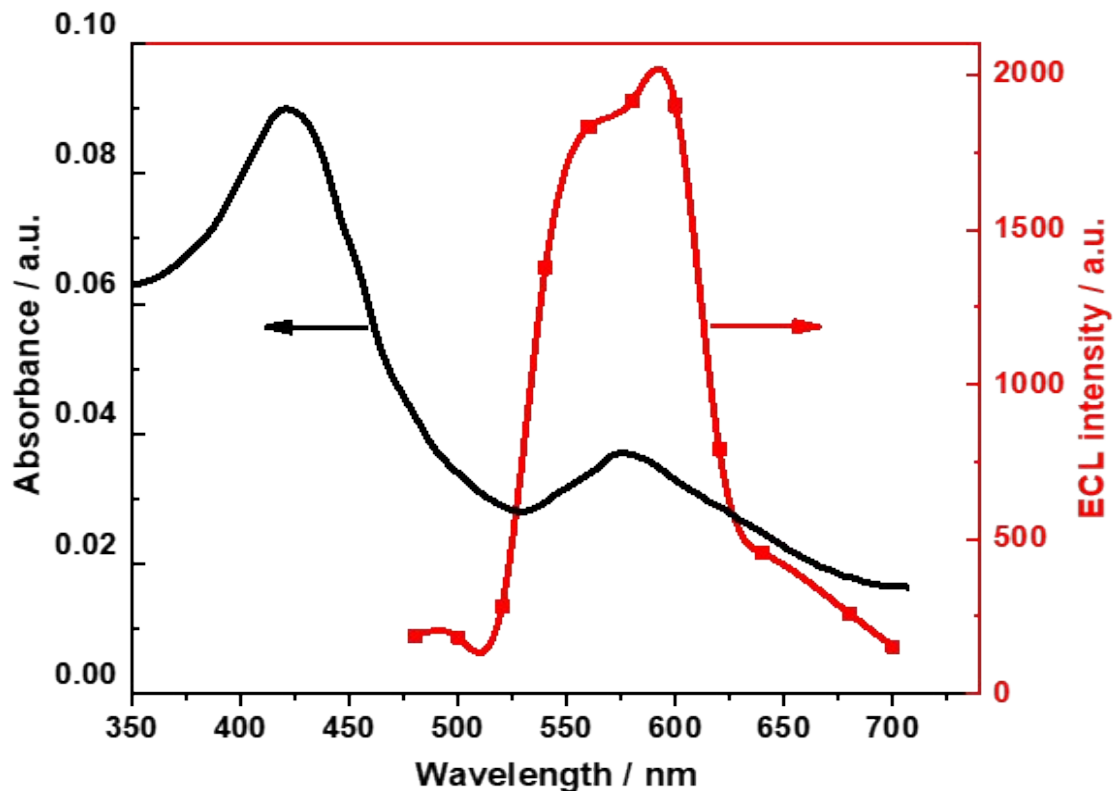

**Fig. S8.** UV-vis absorption of Ag nanoclusters (black curve) and ECL emission spectra (red curve) of Au@I.

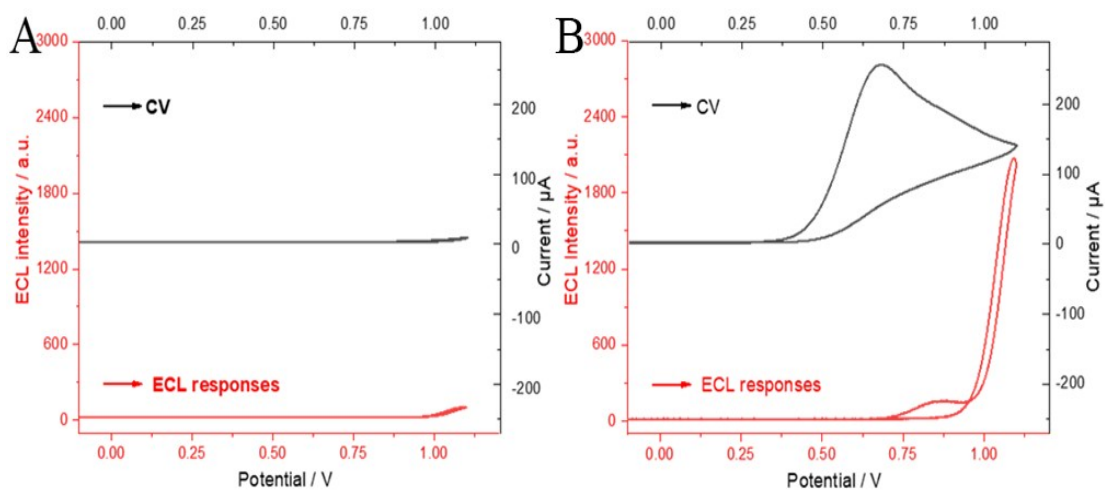

**Fig. S9.** CV curve (black curve) and ECL emission spectra (red curve) of Au@I nanocomposites in (A) PBS solution, (B) PBS+18 mM TEA solution

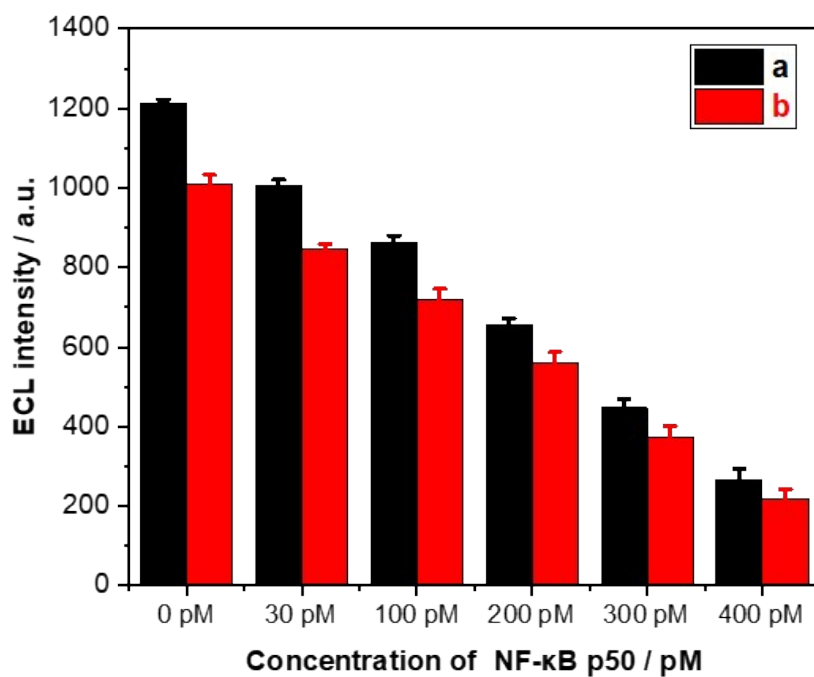

**Fig. S10.** Histogram of ECL intensity while detecting different concentrations of NF- $\kappa$ B p50 in 0.1 mM PBS buffer containing 18 mM TEA (a) and TrPA (b) as co-reactant, respectively.

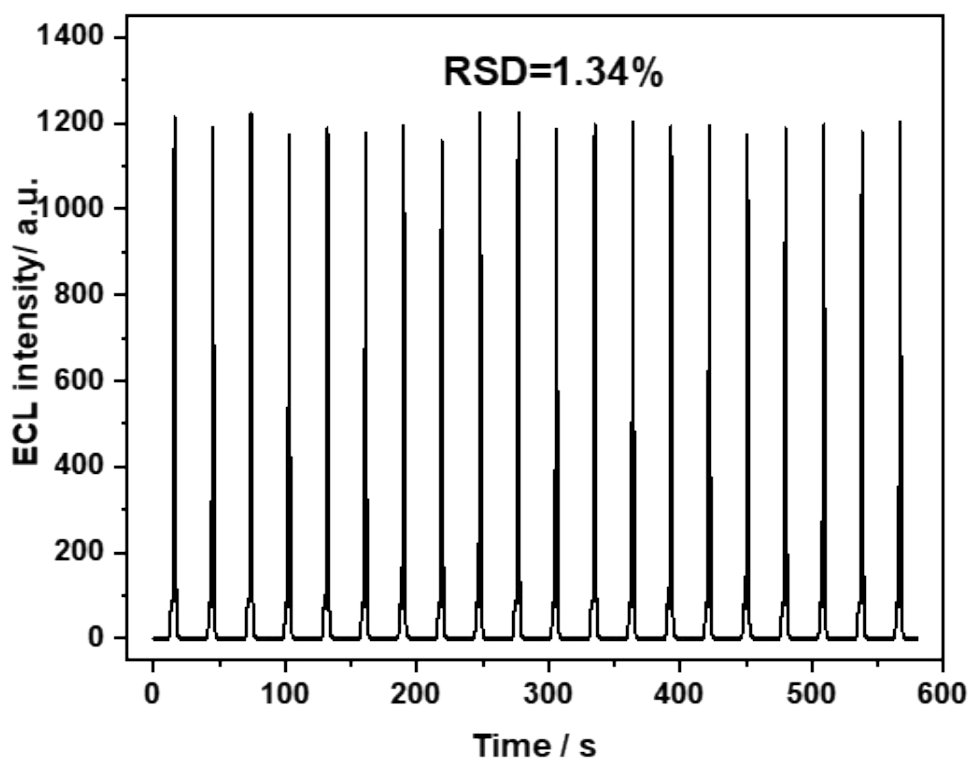

**Fig. S11.** Stabilization of ECL emission from the proposed biosensor with 5 pM NF- $\kappa$ B p50 under a continuous cyclic voltammetry for 20 cycles. The scan rate is 100 mV s<sup>-1</sup>.

**Table S3.** Comparison of sensitivity and detection means of transcription factor reported in recent years.

| Detection method                                                                                                                                                                 | Linear range    | Detection limit | Ref. |
|----------------------------------------------------------------------------------------------------------------------------------------------------------------------------------|-----------------|-----------------|------|
| Sensitive Detection of Transcription Factors by Isothermal Exponential Amplification-Based Colorimetric Assay                                                                    | 5 to 2000 pM    | 3.8 pM          | 6    |
| Sensitive Detection of Transcription Factors Using Near-Infrared Fluorescent Solid-Phase Rolling Circle Amplification                                                            | 0 to 50 fM      | 10 fM           | 7    |
| Silver ion-stabilized DNA triplexes for completely enzyme-free and sensitive fluorescence detection of transcription factors <i>via</i> catalytic hairpin assembly amplification | 5 to 150 pM     | 1.5 pM          | 8    |
| Sensitive and Label-Free Fluorescent Detection of Transcription Factors Based on DNA-Ag Nanoclusters Molecular Beacons and Exonuclease III-Assisted Signal Amplification         | 30 pM to 1.5 nM | 10 pM           | 9    |

|                                                                                                                                                                         |                |         |    |
|-------------------------------------------------------------------------------------------------------------------------------------------------------------------------|----------------|---------|----|
| Amplified probing of protein/DNA interactions for sensitive fluorescence detection of transcription factors                                                             | 10 to 50 pM    | 0.54 pM | 10 |
| A highly selective, label-free, homogenous luminescent switch-on probe for the detection of nanomolar transcription factor NF-kappaB                                    | 10 to 220 nM   | 30 nM   | 11 |
| Specific DNA-Binding Protein via a Gold Nanoparticle-Based Colorimetric Biosensor                                                                                       | 0 to 120 nM    | 10 nM   | 12 |
| Protein binding-protected DNA three-way junction-mediated rolling circle amplification for sensitive and specific detection of transcription factors                    | 8 pM to 15 nM  | 6.8 pM  | 13 |
| Label-free electrochemiluminescent detection of transcription factors with hybridization chain reaction amplification                                                   | 50 pM to 2 nM  | 17 pM   | 14 |
| Ultrasensitive Homogeneous Electrochemical Detection of Transcription Factor by Coupled Isothermal Cleavage Reaction and Cycling Amplification Based on Exonuclease III | 10 pM to 30 nM | 10 pM   | 4  |

## Notes and references

1. X. Feng, N. Gan, H. Zhang, Q. Yan, T. Li, Y. Cao, F. Hu, H. Yu and Q. Jiang, *Biosens. Bioelectron.*, 2015, **74**, 587-593.
2. G. Li and Y. Luo, *Inorg. Chem.*, 2008, **47**, 360-364.
3. K. Zhang, K. Wang, X. Zhu and M. Xie, *Biosens. Bioelectron.*, 2016, **77**, 264-269.
4. L. Lu, H. Su and F. Li, *Anal. Chem.*, 2017, **89**, 8328-8334.
5. Y. Zhang, D. Xiang, B. Tang and C.-Y. Zhang, *Anal. Chem.*, 2017, **89**, 10439-10445.
6. Y. Zhang, J. Hu and C.-Y. Zhang, *Anal. Chem.*, 2012, **84**, 9544-9549.
7. J. Yin, P. Gan, F. Zhou and J. Wang, *Anal. Chem.*, 2014, **86**, 2572-2579.
8. Y. Qin, D. Li, R. Yuan and Y. Xiang, *J. Mater. Chem. B*, 2019, **7**, 763-767.
9. B. Li, L. Xu, Y. Chen, W. Zhu, X. Shen, C. Zhu, J. Luo, X. Li, J. Hong and X. Zhou, *Anal. Chem.*, 2017, **89**, 7316-7323.
10. J. Li, J. Tang, B. Jiang, Y. Xiang and R. Yuan, *J. Mater. Chem. B*, 2018, **6**, 6002-6007.
11. D.-L. Ma, T. Xu, D. S.-H. Chan, B. Y.-W. Man, W.-F. Fong and C.-H. Leung, *Nucleic Acids*

*Res.*, 2011, **39**, e67-e67.

12. L.-J. Ou, P.-Y. Jin, X. Chu, J.-H. Jiang and R.-Q. Yu, *Anal. Chem.*, 2010, **82**, 6015-6024.

13. K. Li, L. Wang, X. Xu, T. Gao, P. Yan and W. Jiang, *RSC Advances*, 2016, **6**, 68846-68851.

14. Y. Xiong, L. Lin, X. Zhang and G. Wang, *RSC Advances*, 2016, **6**, 37681-37688.
